# Supplementary material
Source: PubMed Central journal article supplement (PMC8687755)
Supplement: NIHMS1760523-supplement-1760523_Sup_Fig_1.pdf [file NIHMS1760523-supplement-1760523_Sup_Fig_1.pdf]

**Supplementary Information Figure 1 Uncropped scan images used in this manuscript.** Cropped images used are indicated by red squares.

**Fig.1c**

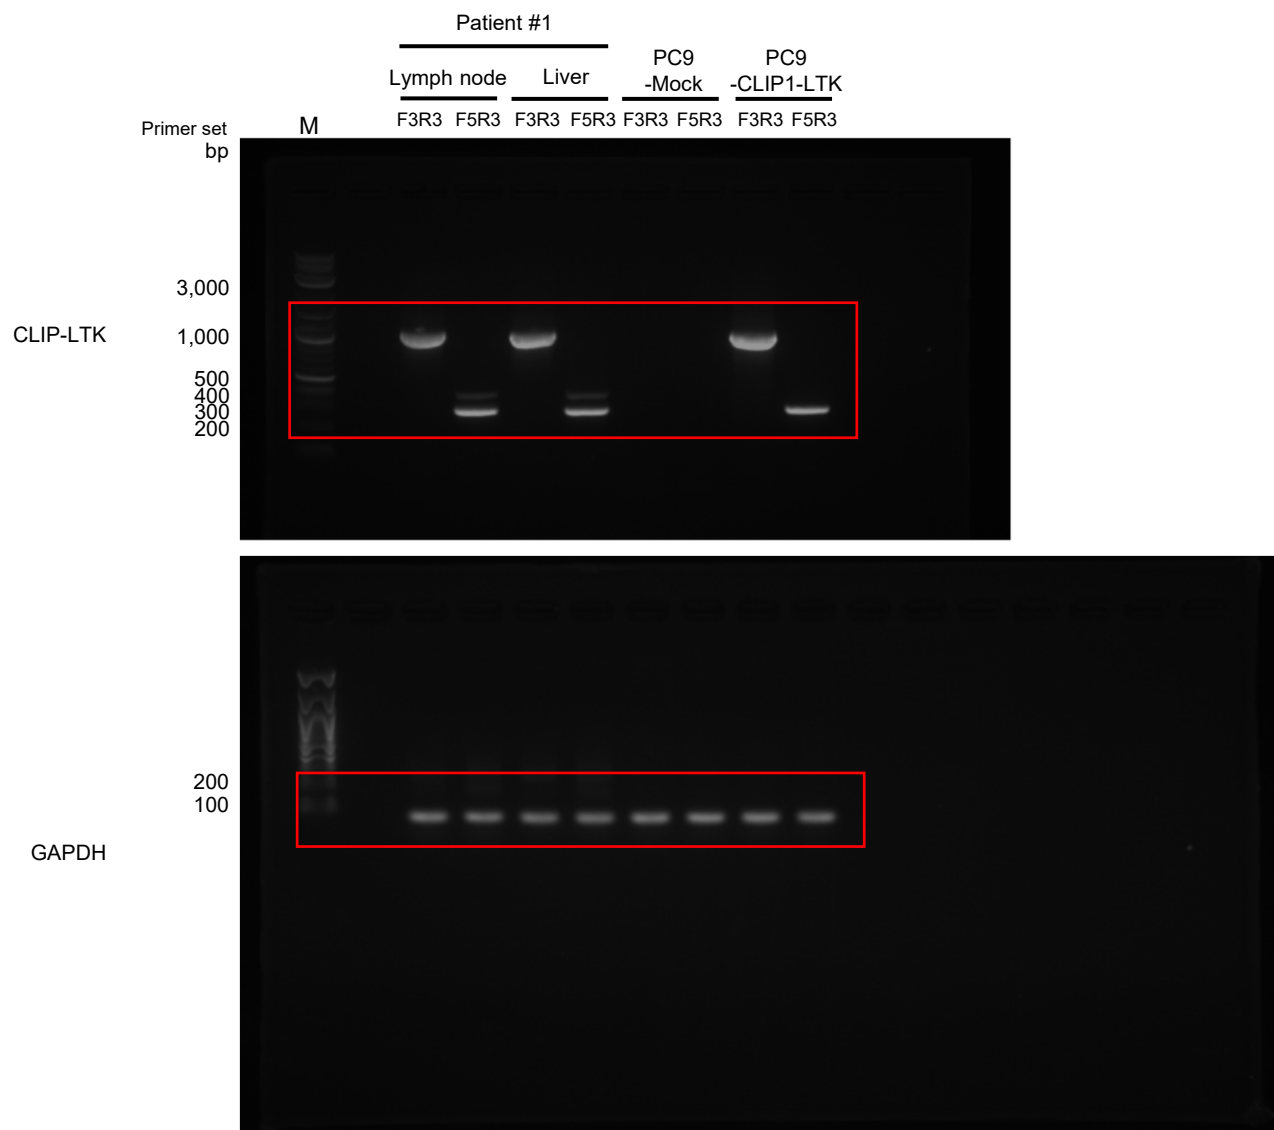

**Fig.1d**

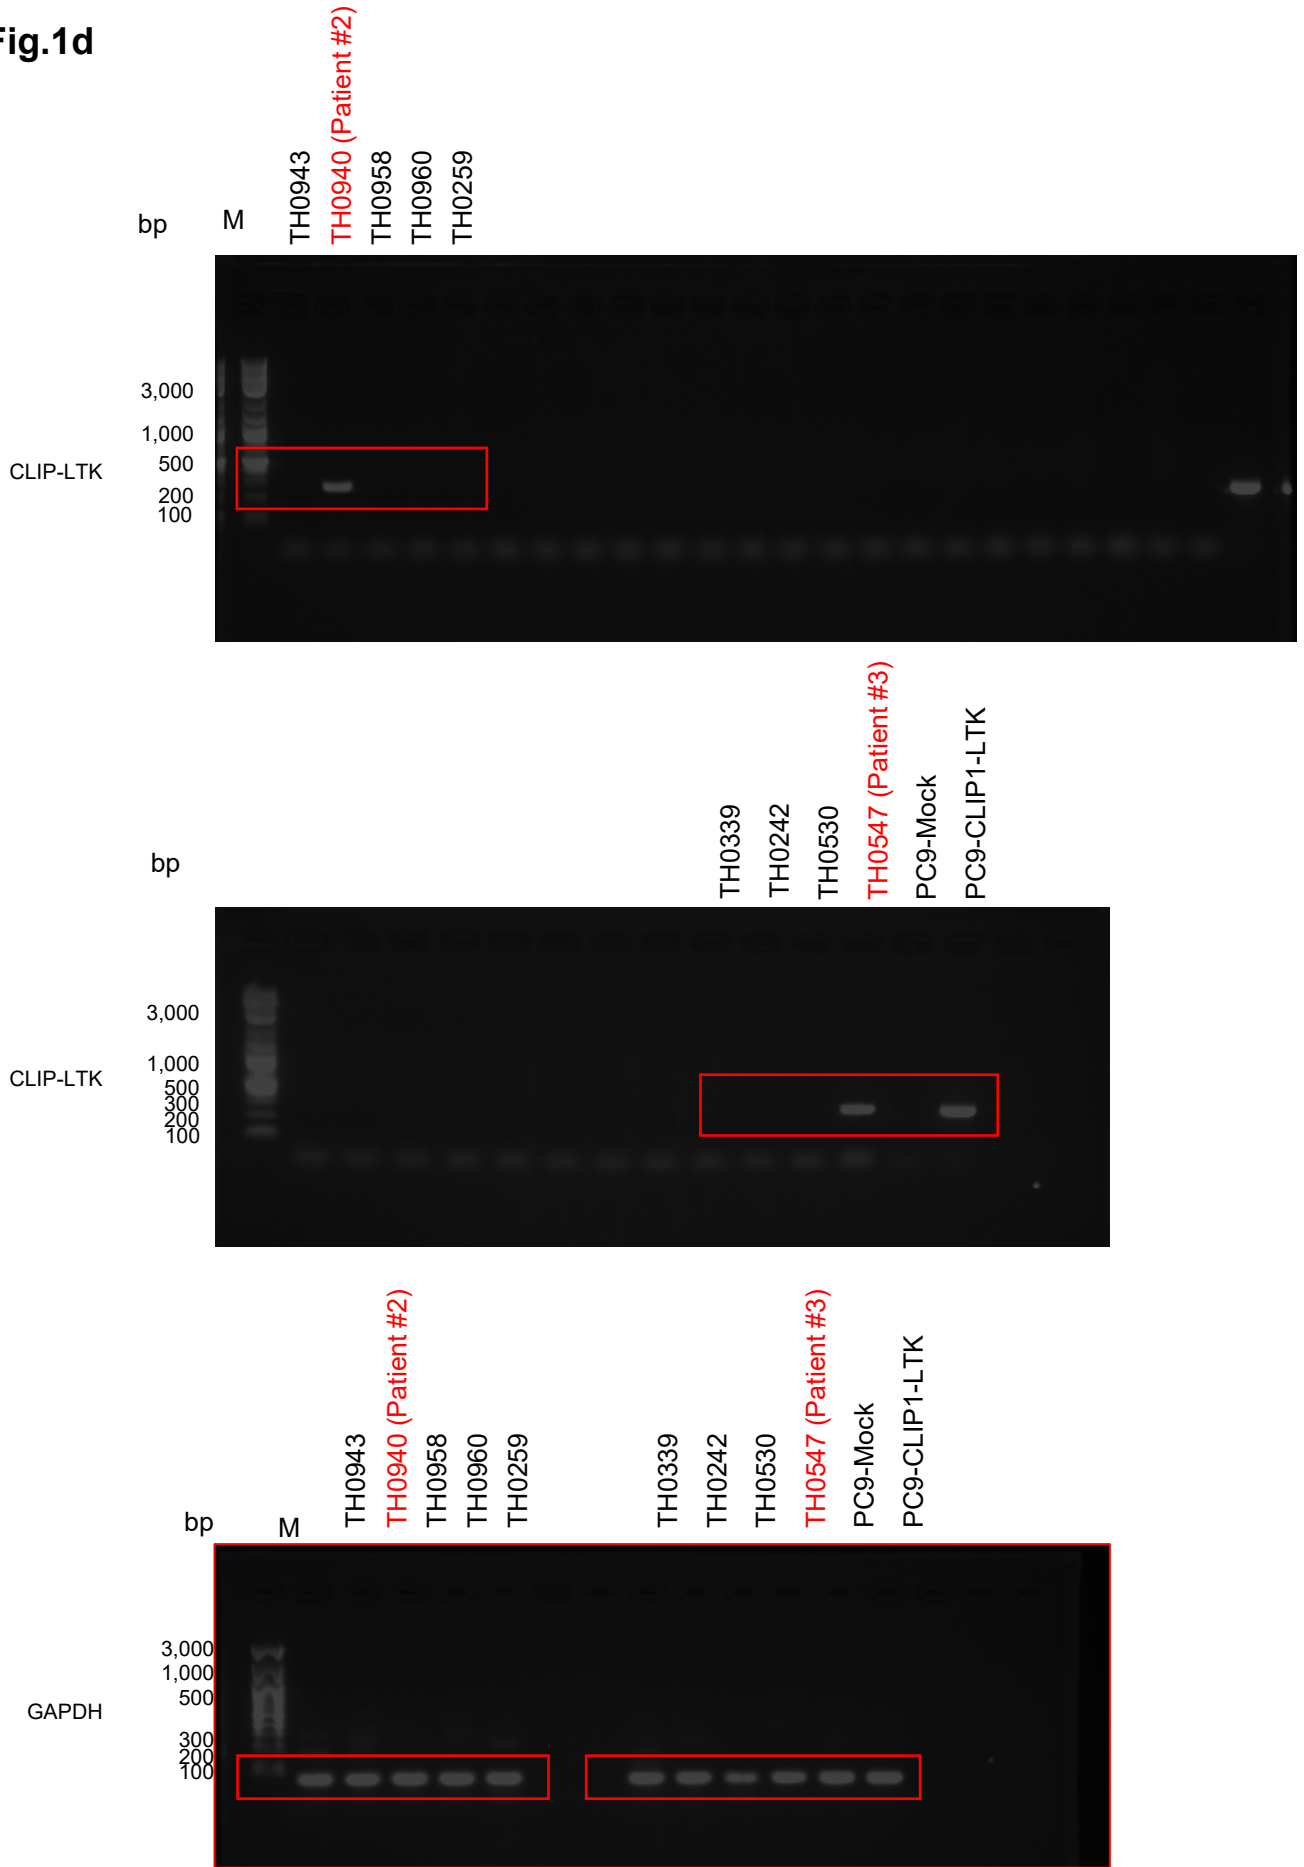

**Fig.2a**

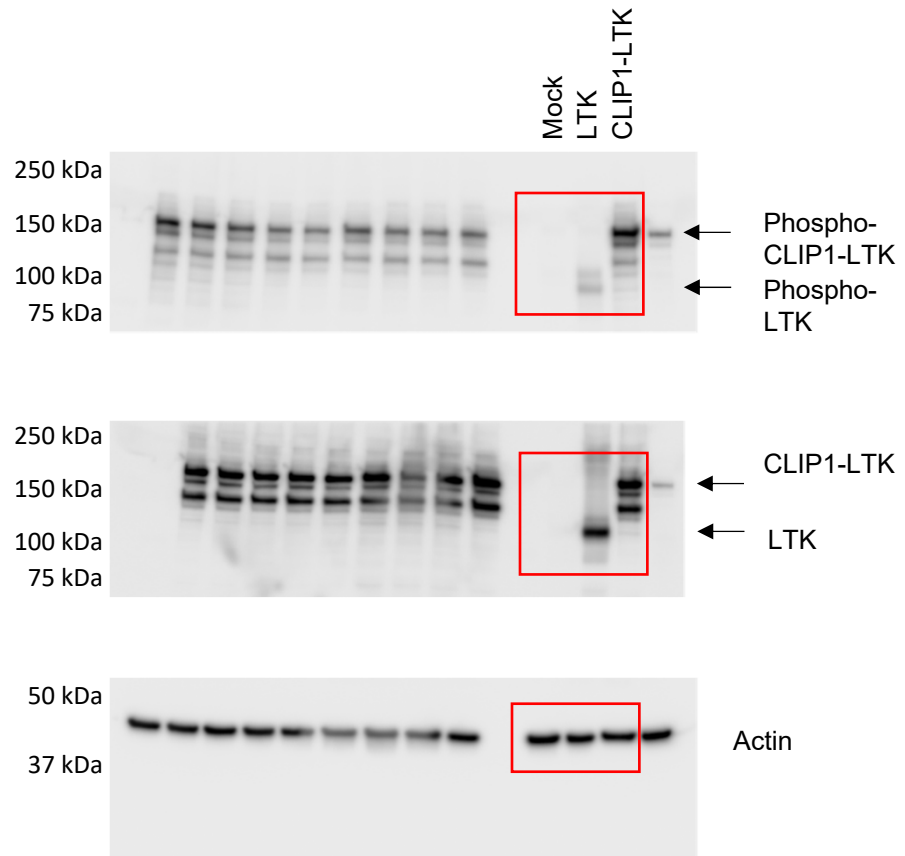

**Fig.2d**

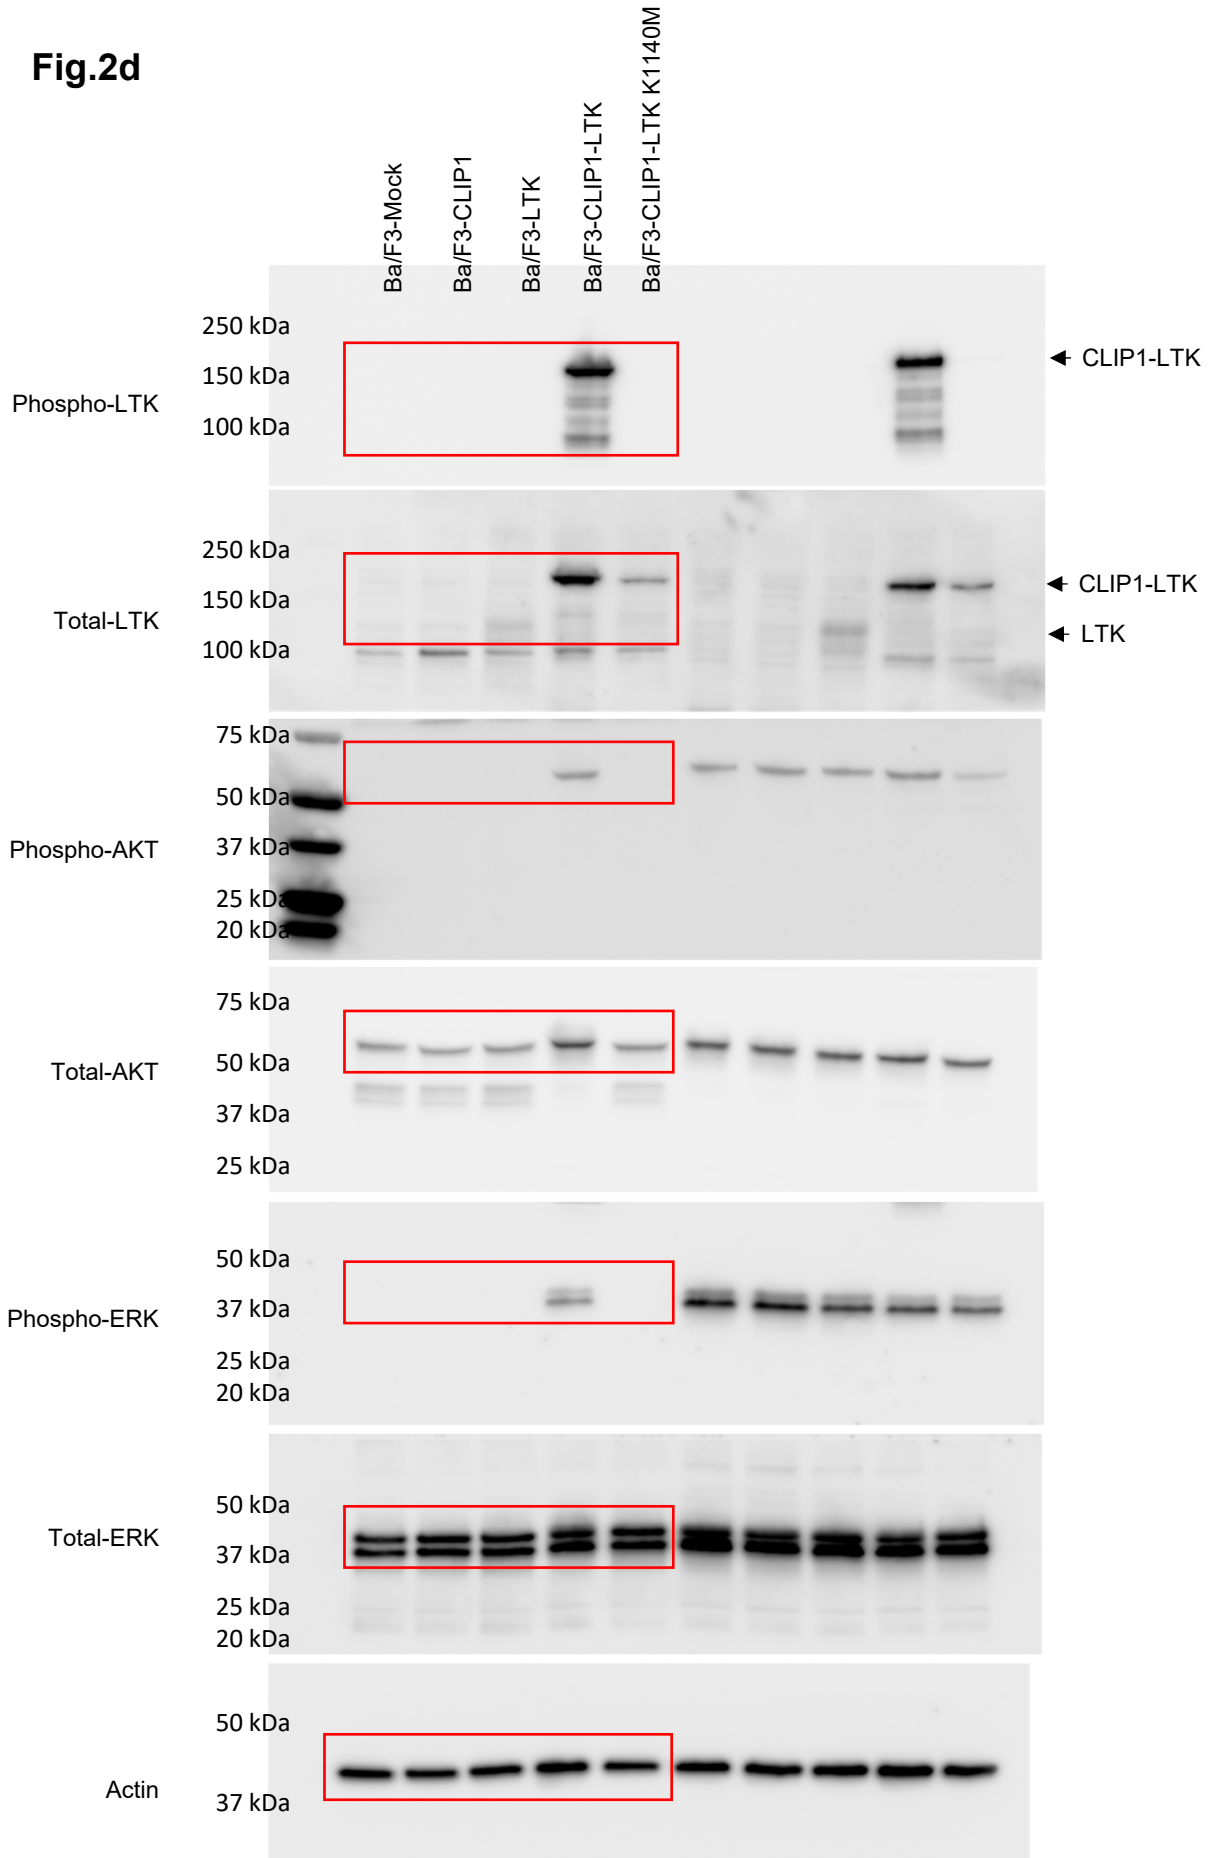

**Fig. 3a**

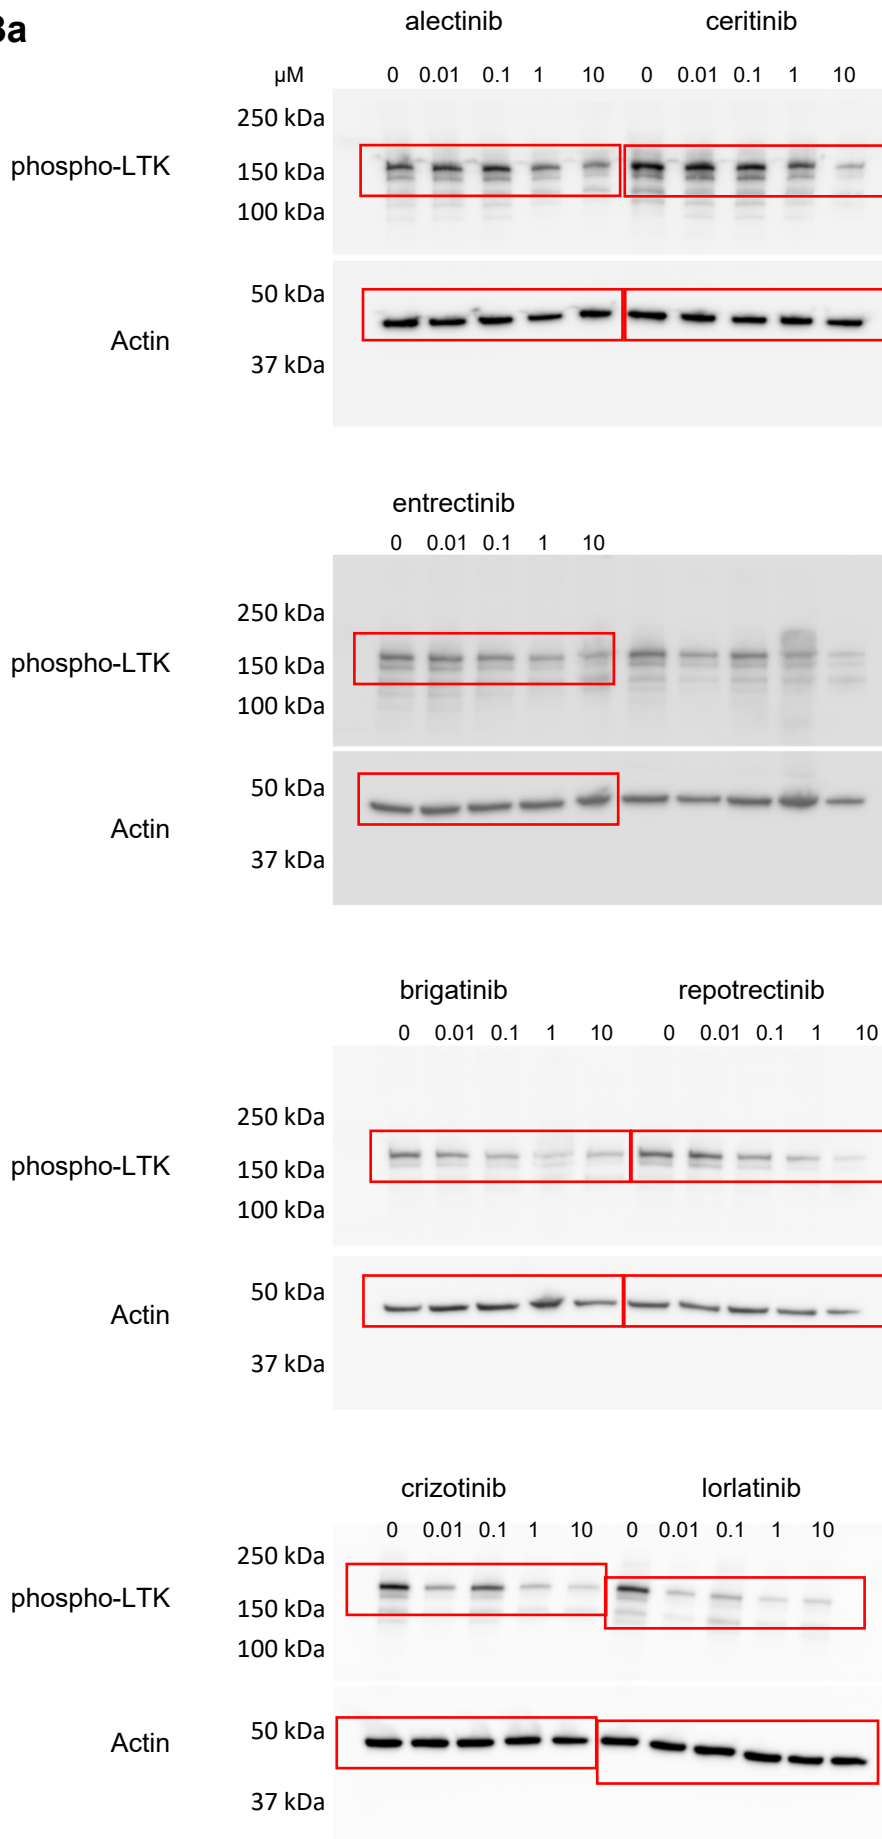

**Fig. 3c**

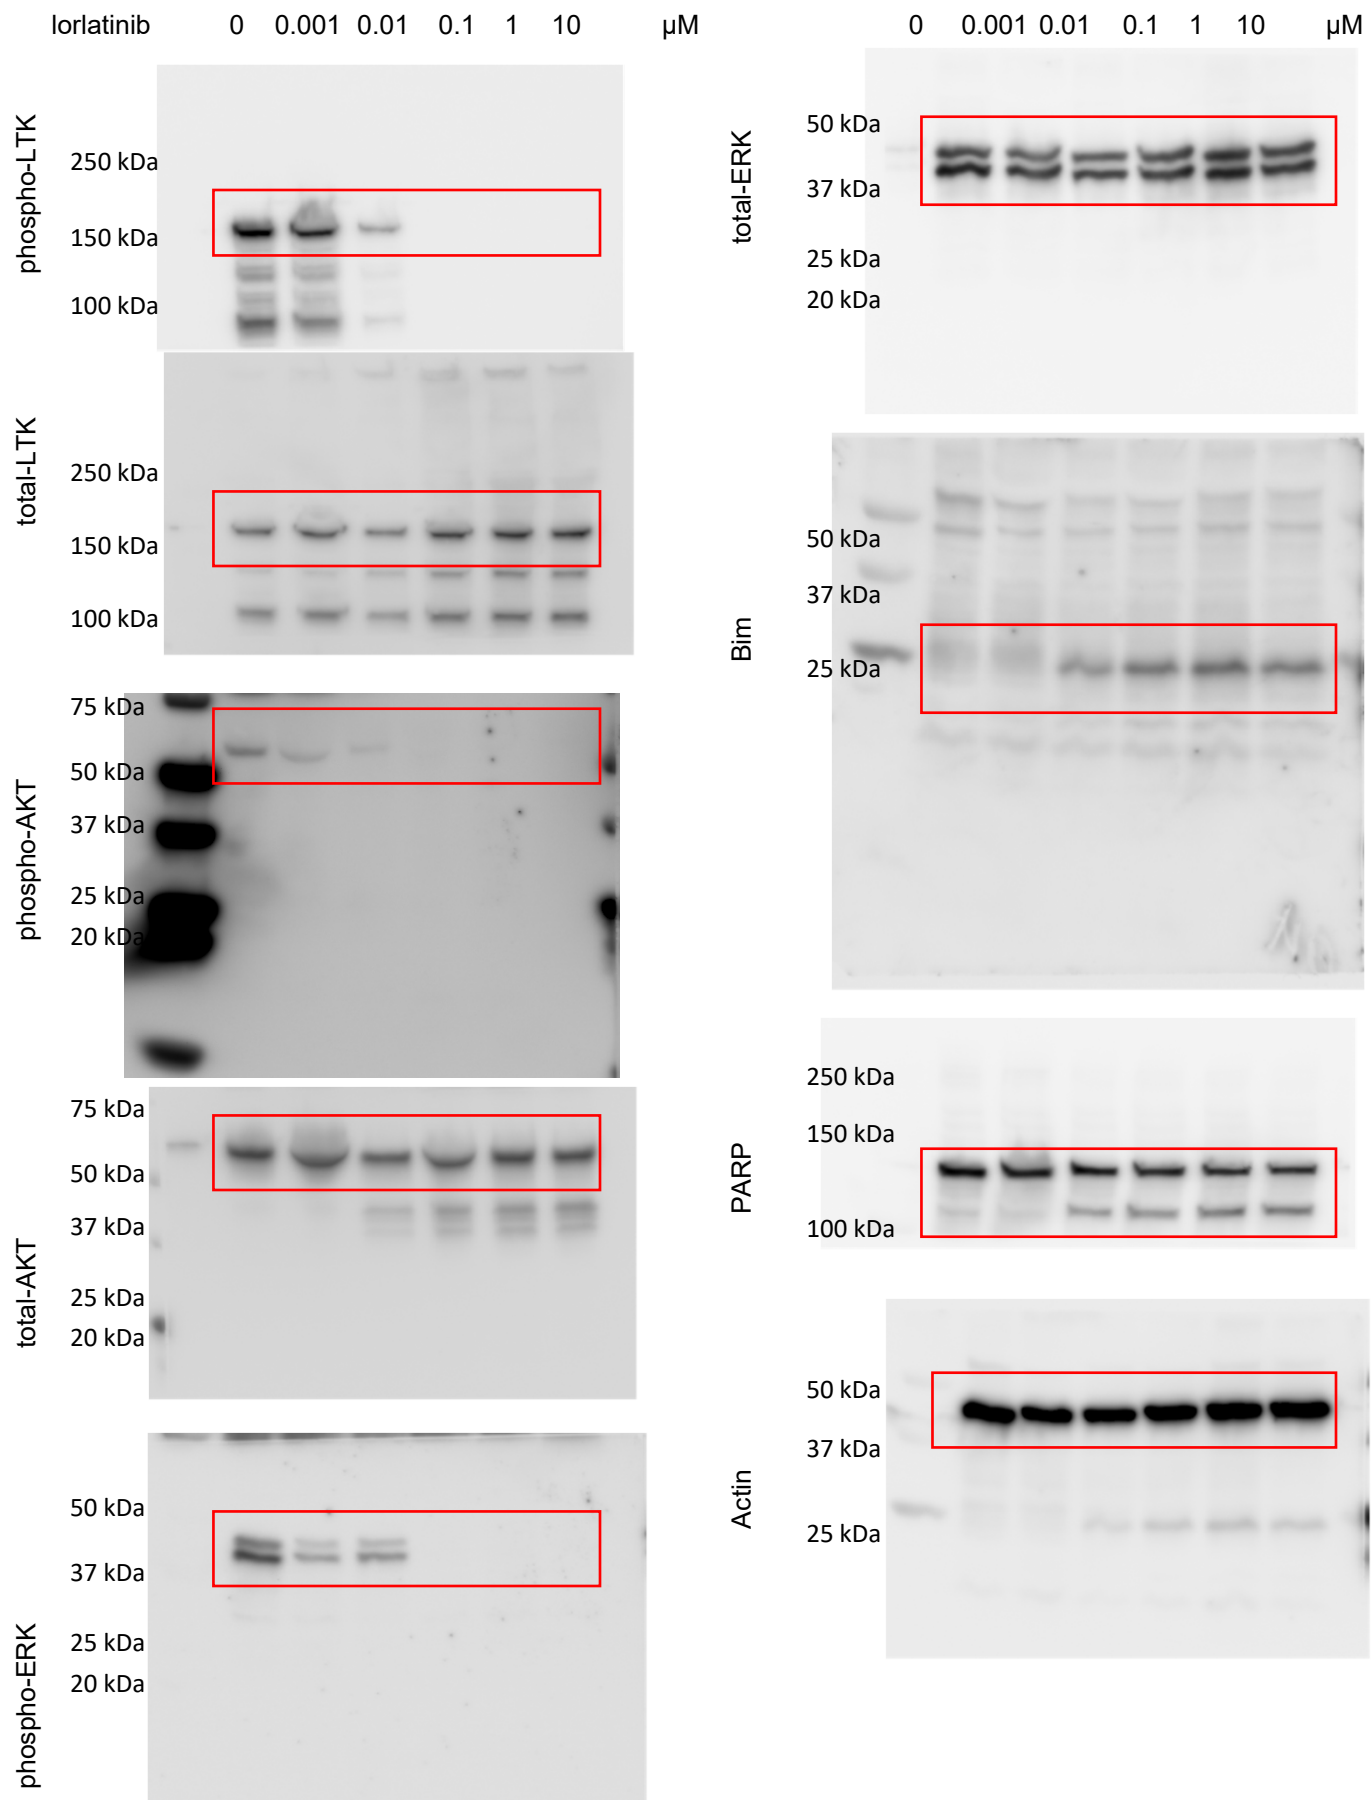

# Extended Data Fig.4a

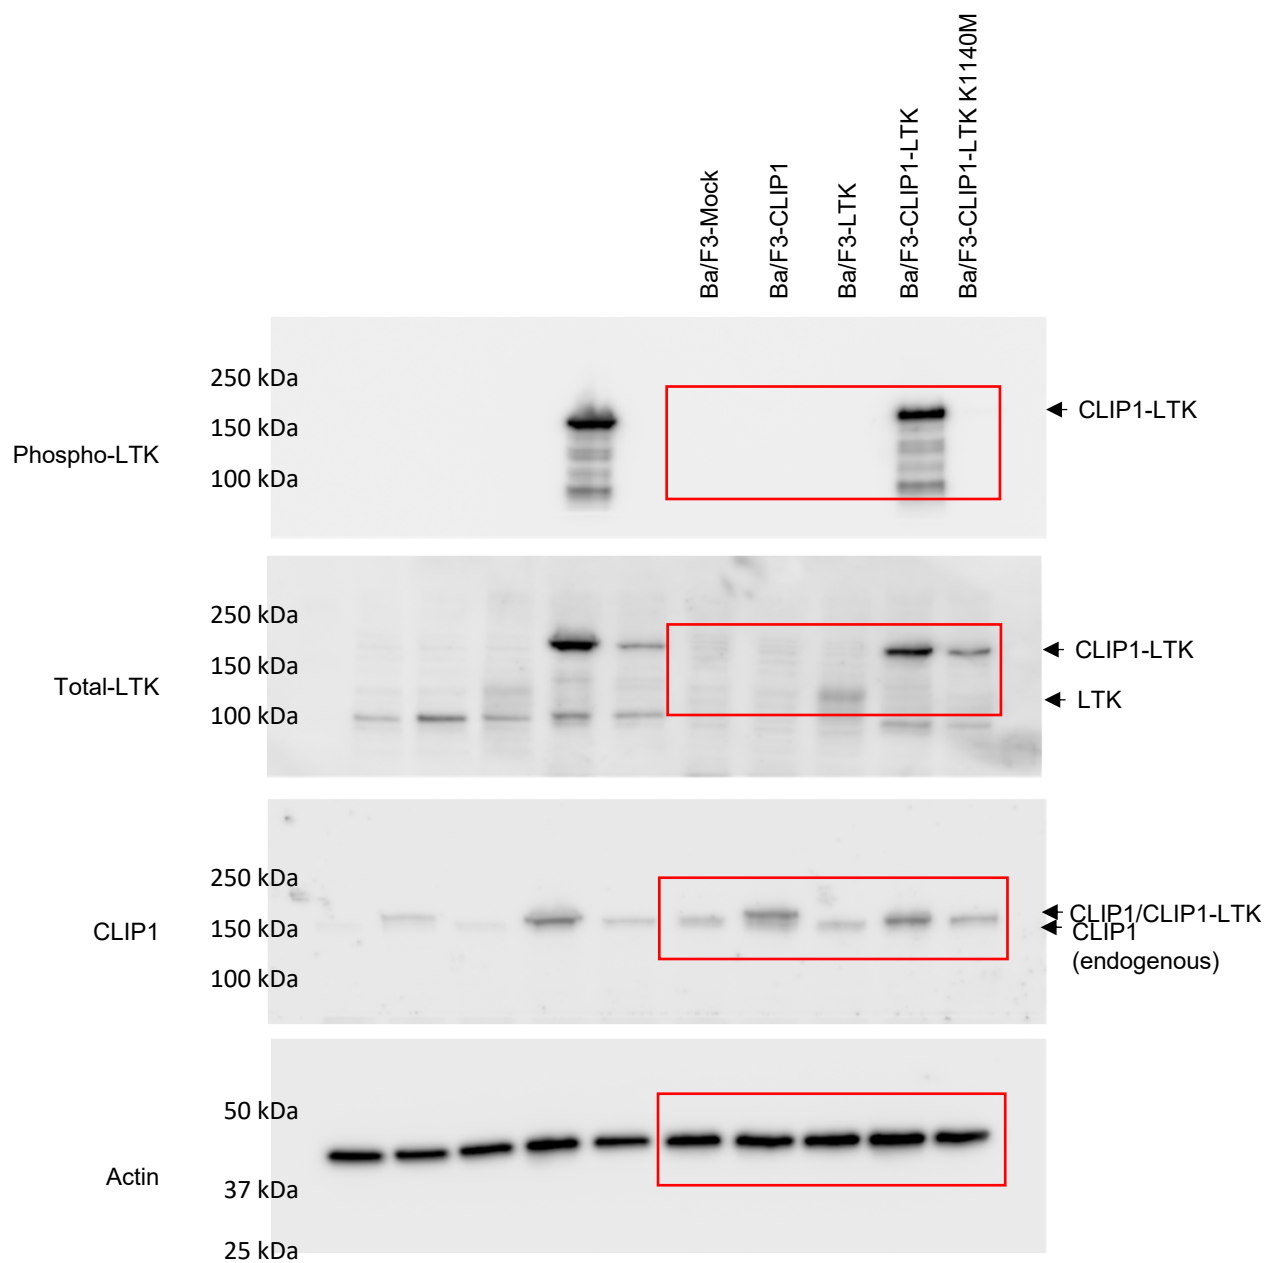

# Extended Data Fig.4b

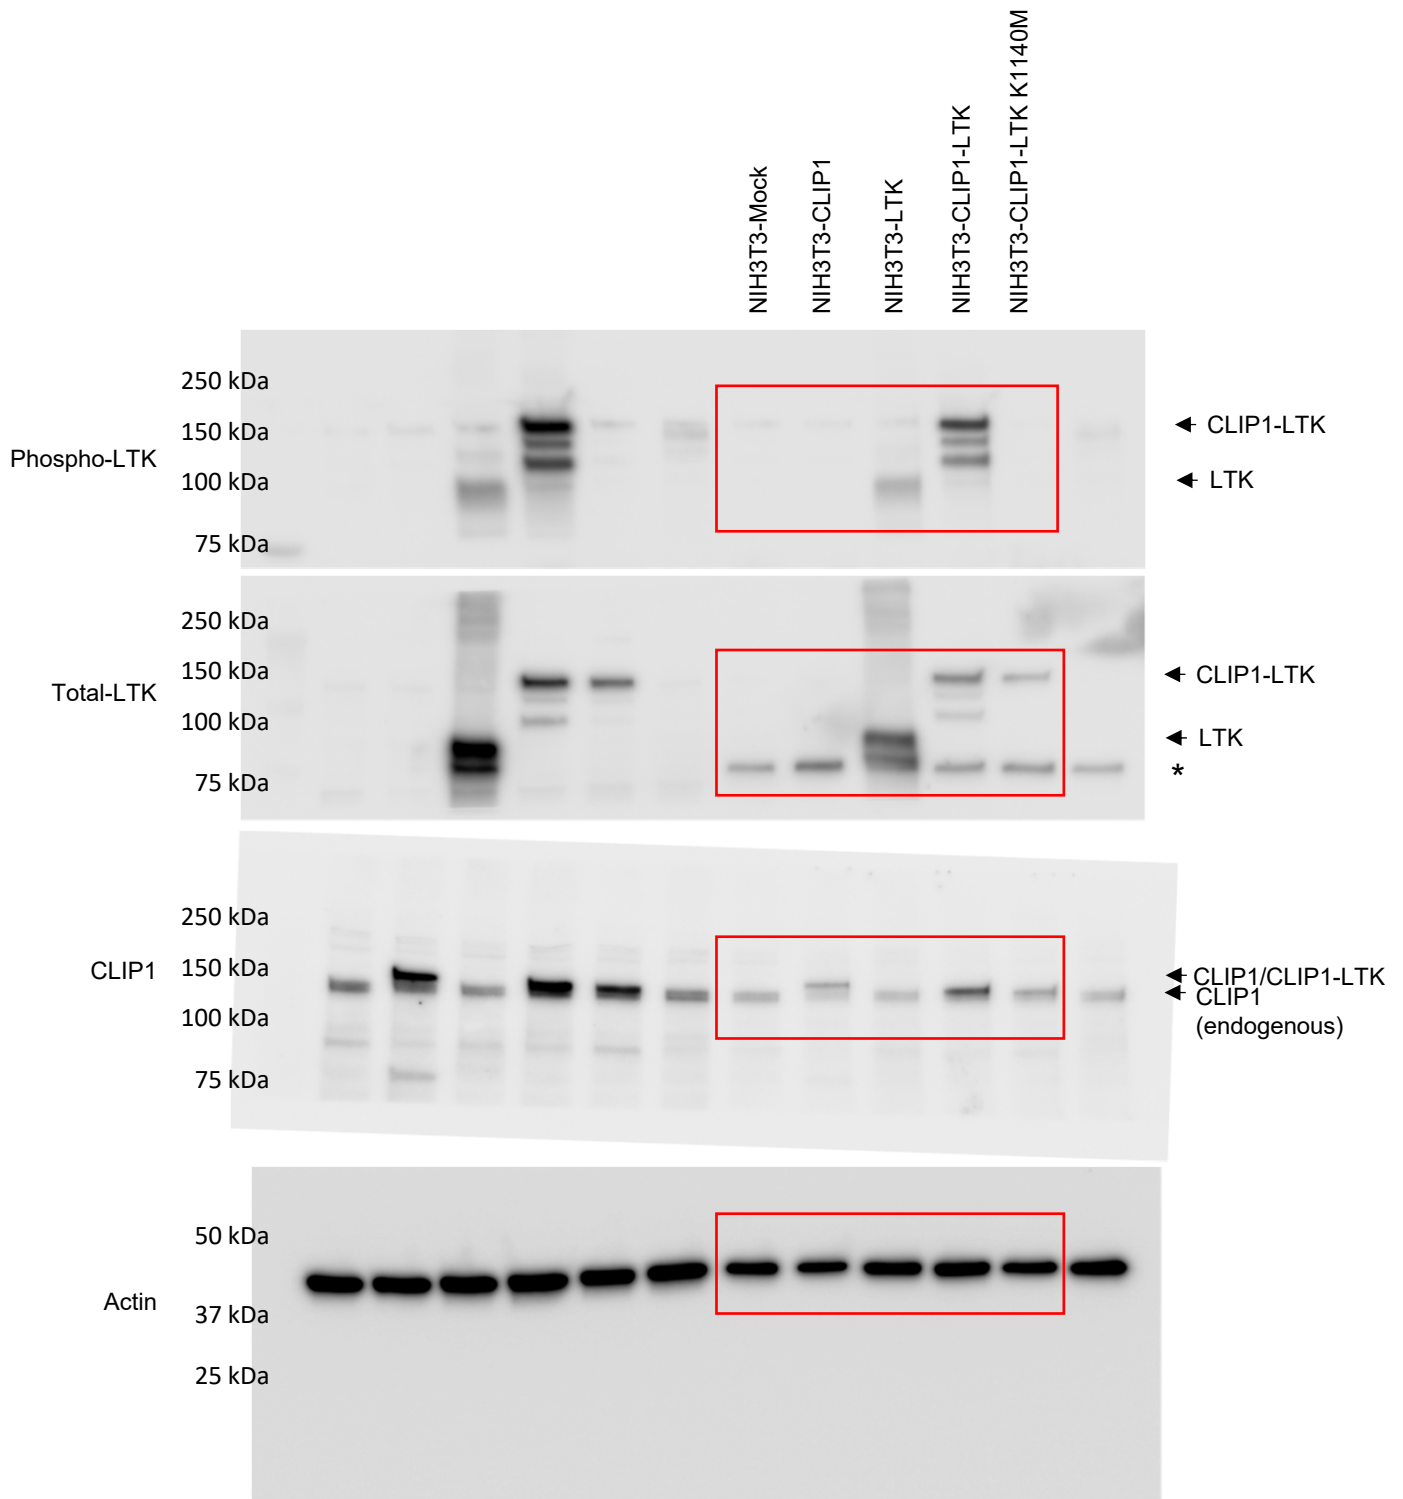

\* Non specific bands
