# Supplementary material
Source: PubMed Central journal article supplement (PMC8687755)
Supplement: NIHMS1760523-supplement-1760523_Sup_Fig_2.pdf [file NIHMS1760523-supplement-1760523_Sup_Fig_2.pdf]

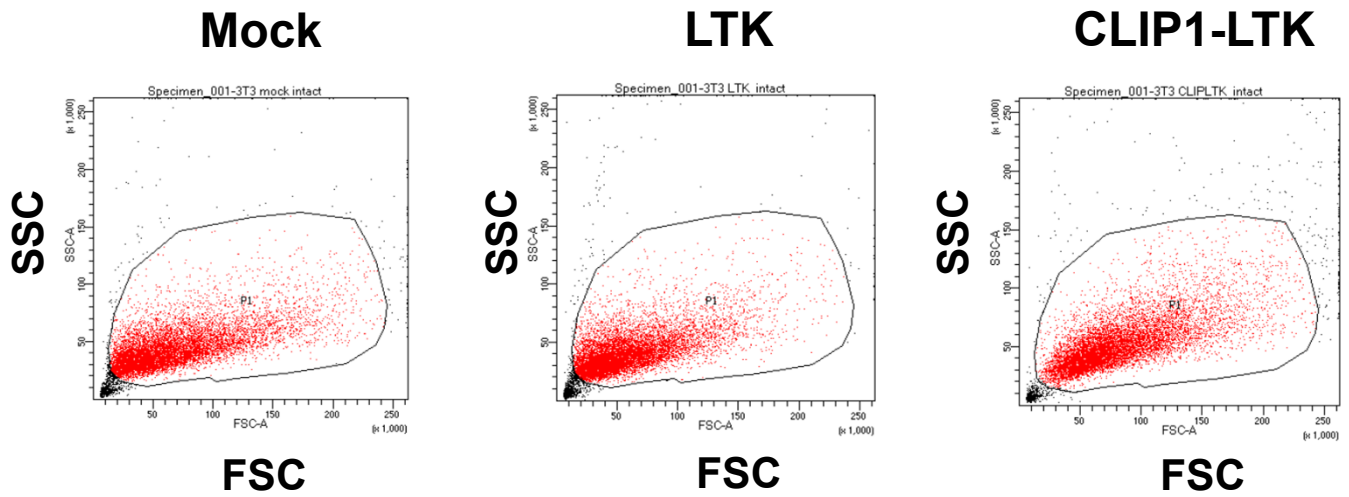

**Supplementary Information Figure 2 Gating strategy for live cells.** Total cells are gated on SSC/FSC plot where viable cells are selected as P1, and then analyzed as shown in Extended Data Fig. 5a.
